# Supplementary material for: Highly reversible Zn electrodeposition enabled by glutathione-protected copper nanoclusters for aqueous Zn-ion batteries
Source: Royal Society of Chemistry journal article supplement (doi:10.1039/d4qi02605e), 2024-11-27
Supplement: d4qi02605e1.pdf [file d4qi02605e1.pdf]

## Supporting Information

### Highly reversible Zn electrodeposition enabled by glutathione-protected copper nanoclusters for aqueous Zn-ion batteries

Lu-Fan Wang, Xiao-Yuan Wang, Shu Xu, Zhou Wu, Guoqiang Sun\*, Xiao-Fei Liu\*, Ren-Wu Huang and Shuang-Quan Zang

Henan Key Laboratory of Crystalline Molecular Functional Materials, Green Catalysis Center, College of Chemistry, Zhengzhou University, Zhengzhou 450001, Henan, China.

\*Corresponding authors.

E-mail address: sungq@zzu.edu.cn; liuxiaofei@zzu.edu.cn

#### Calculations:

The depth of discharge (DOD) of the Zn anode is calculated as follows:<sup>1</sup>

$$\text{DOD} = \frac{y}{C_{\text{Zn,volume}} \cdot x \times 10^{-4}} \times 100\% = \frac{y}{0.585x} \times 100\% \quad (1)$$

Where  $x$  ( $\mu\text{m}$ ) represents the thickness of the zinc foil used,  $y$  ( $\text{mAh cm}^{-2}$ ) is areal capacity, and  $C_{\text{Zn,volume}}$  ( $5854 \text{ mAh cm}^{-3}$ ) represents theoretical volume capacity.

$$\text{DOD} = \frac{y}{C_{\text{Zn, mass}} \cdot m \times 10^{-3}} \times 100\% = \frac{y}{x} \times 100\% \quad (2)$$

Where  $x$  ( $\text{mAh cm}^{-2}$ ) represents pre-deposited Zn areal capacity,  $y$  ( $\text{mAh cm}^{-2}$ ) represents the actual areal capacity used during the testing,  $C_{\text{Zn, mass}}$  ( $820 \text{ mAh g}^{-1}$ ) is theoretical mass capacity, and  $m$  ( $\text{mg cm}^{-2}$ ) represents pre-deposited Zn mass.

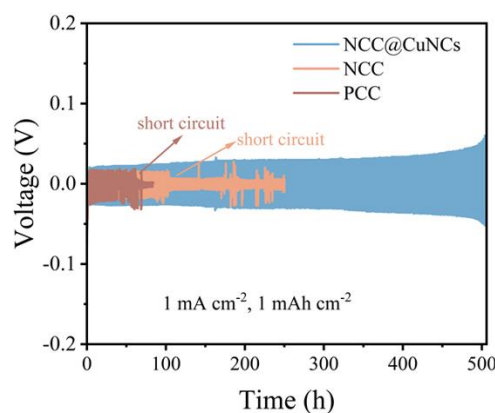

**Fig. S1** Galvanostatic cycling of symmetric cells of Zn//NCC@CuNCs, Zn//NCC, and Zn//PCC at  $1 \text{ mA cm}^{-2}$ ,  $1 \text{ mAh cm}^{-2}$ .

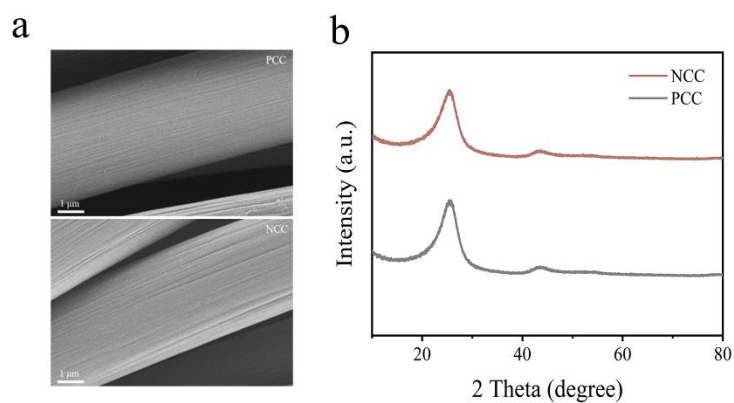

**Fig. S2** (a) SEM images (b) XRD profiles of PCC and NCC.

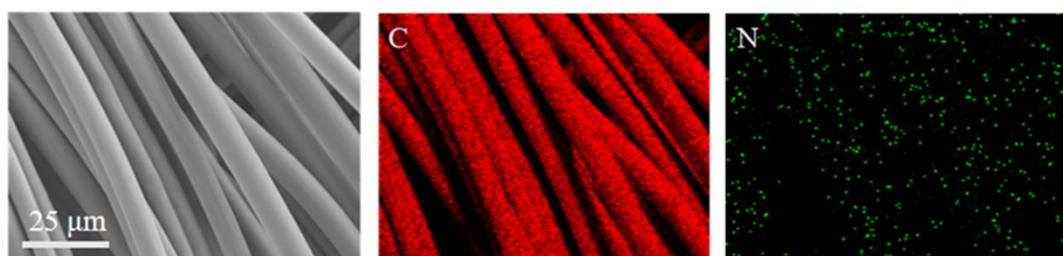

**Fig. S3** SEM image of NCC and distribution of C, N elements.

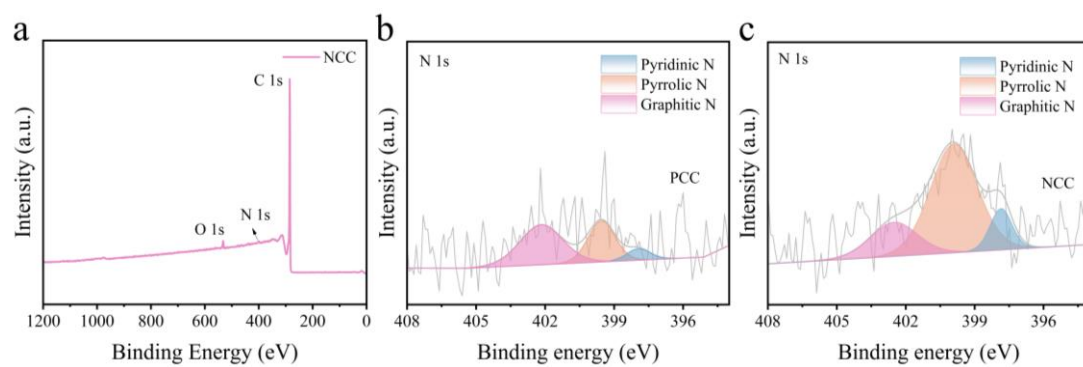

**Fig. S4** (a) XPS survey spectrum of NCC. XPS high-resolution N 1s spectra of (b) PCC and (c) NCC.

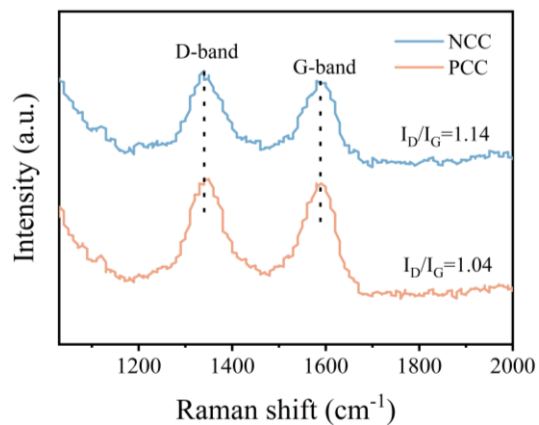

**Fig. S5** Raman spectra of PCC and NCC samples.

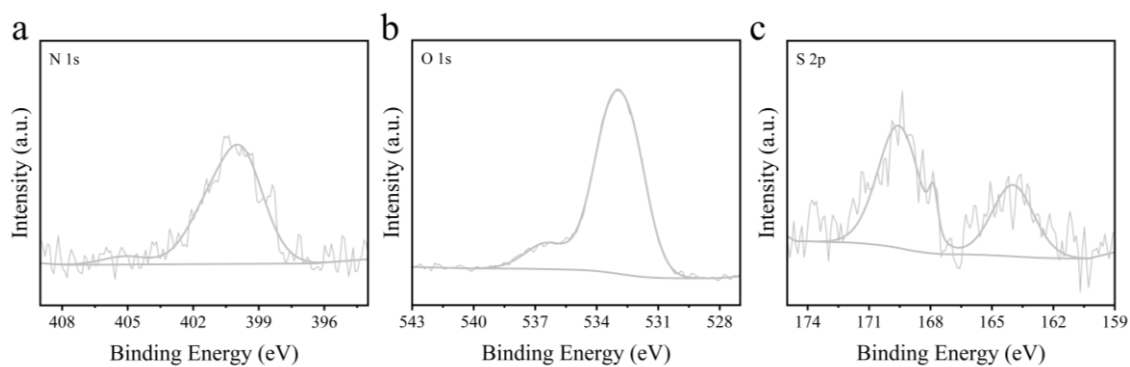

**Fig. S6** XPS high-resolution spectra of NCC@CuNCs: (a) N 1s, (b) O 1s, (c) S 2p.

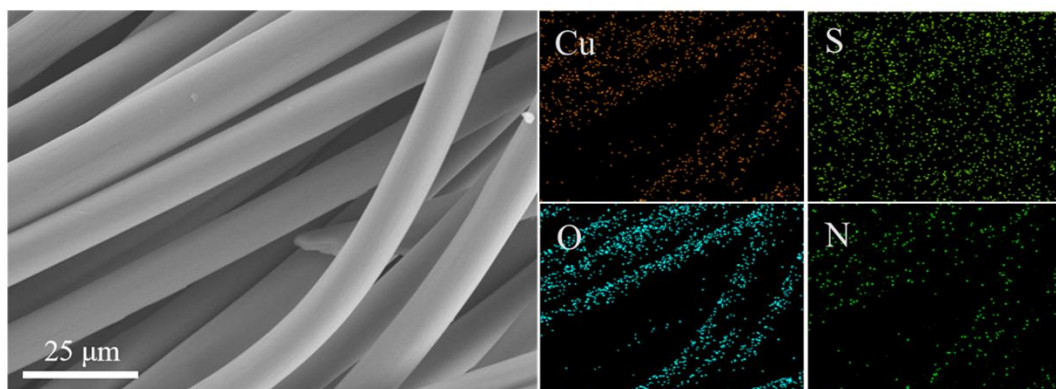

**Fig. S7** SEM image of NCC@CuNCs with EDS mappings of Cu, S, O, and N elements, respectively.

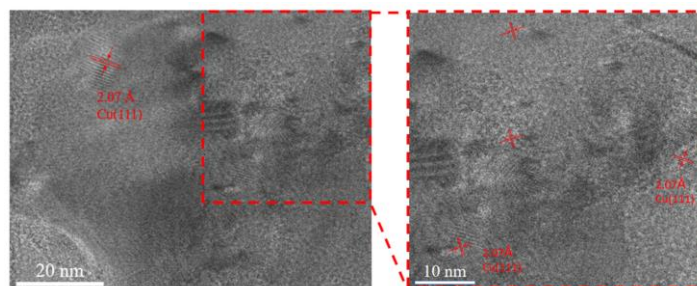

**Fig. S8** TEM image and partial magnification of NCC@CuNCs.

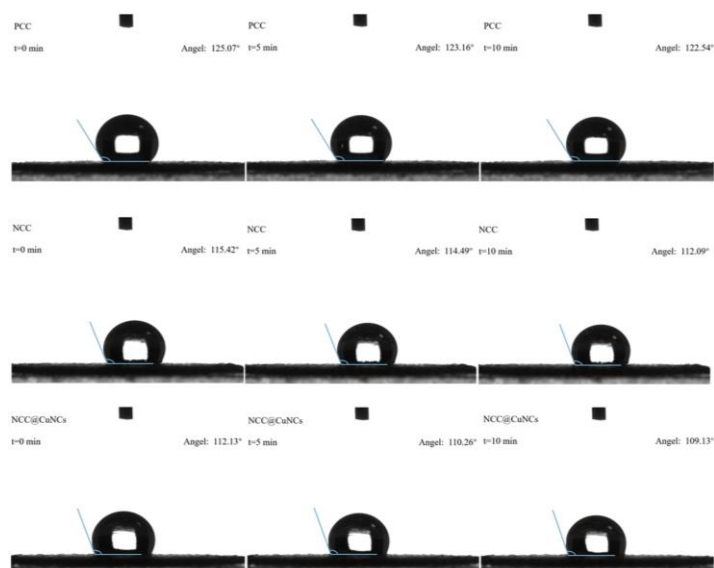

**Fig. S9** Contact angle measurements of the 2 M ZnSO<sub>4</sub> electrolyte on PCC, NCC, and NCC@CuNCs substrates in the initial state and at rest for 5 and 10 minutes, respectively.

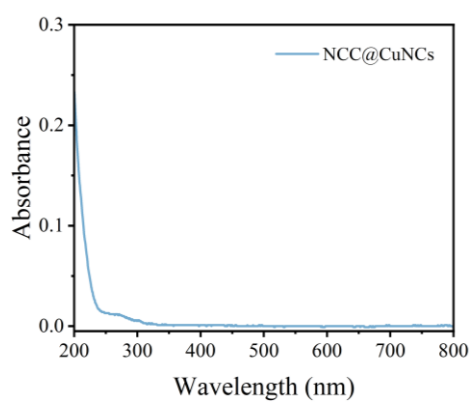

**Fig. S10** UV-vis image of NCC@CuNCs substrate after Zn deposition/stripping of equal capacity (5 mAh cm<sup>-2</sup>).

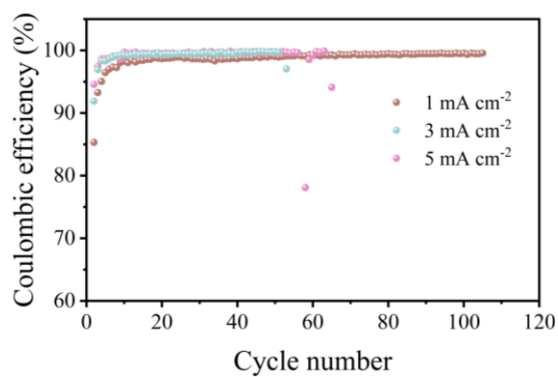

**Fig. S11** Asymmetric batteries test of Zn//PCC@CuNCs at current densities of 1, 3, and 5 mA cm<sup>-2</sup> respectively.

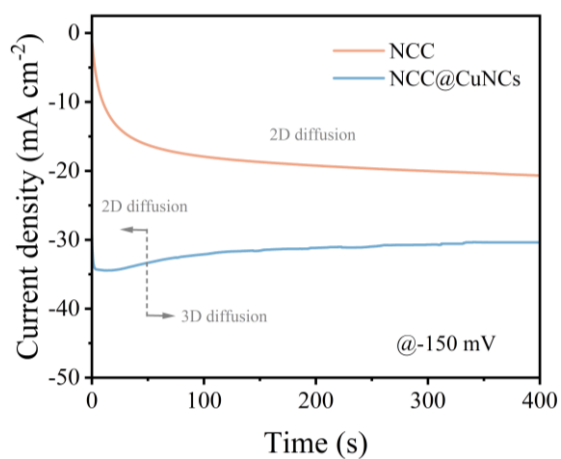

**Fig. S12** Chronoamperometry curves of NCC and NCC@CuNCs at a constant voltage of -150 mV.

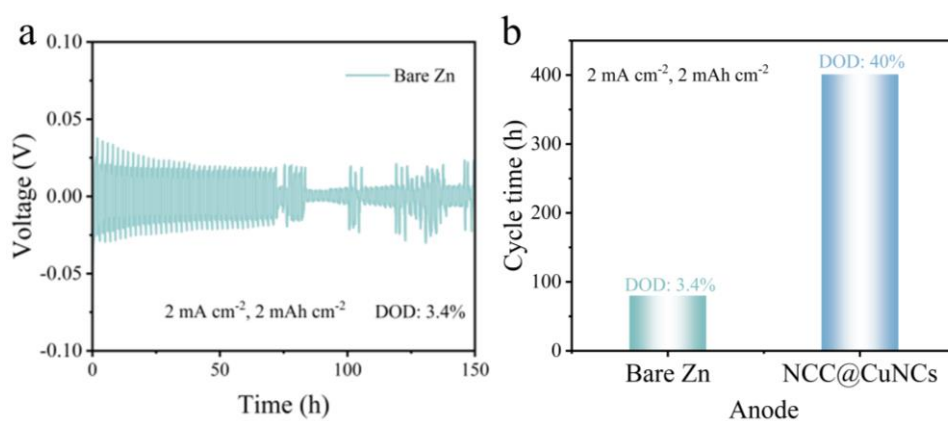

**Fig. S13** (a) Galvanostatic cycling of symmetric cell of Zn//Zn at 2 mA cm<sup>-2</sup>. (b) Cycling performance of symmetric cells Zn//Zn and Zn//NCC@CuNCs at 2 mA cm<sup>-2</sup>.

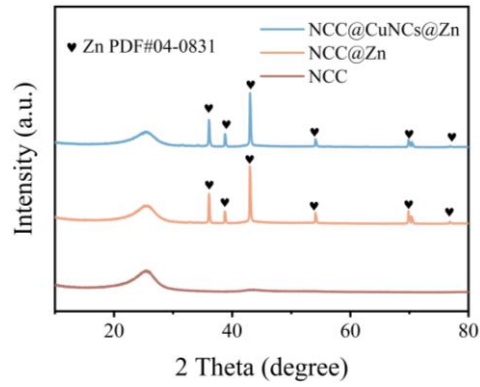

**Fig. S14** XRD patterns of NCC, NCC@Zn and NCC@CuNCs@Zn.

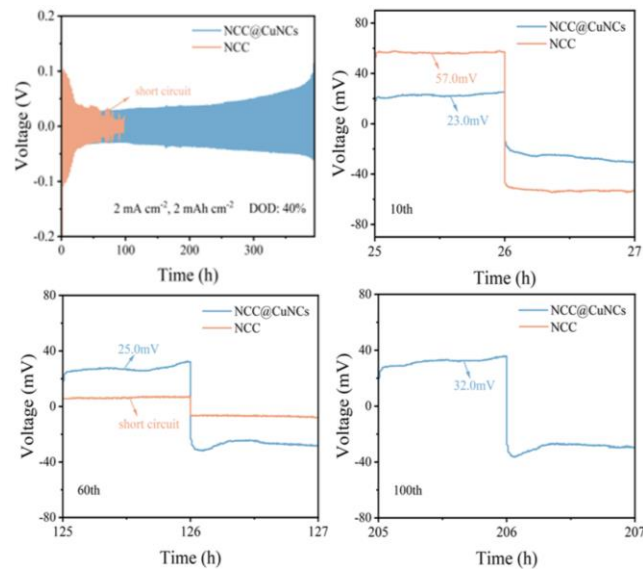

**Fig. S15** Galvanostatic cycling of symmetric cells of Zn//NCC, Zn//NCC@CuNCs at  $2 \text{ mA cm}^{-2}$ ,  $2 \text{ mAh cm}^{-2}$  (attached pictures: Enlarged diagrams of voltage profiles of Zn//NCC and Zn//NCC@CuNCs at the 10, 60 and 100 cycles).

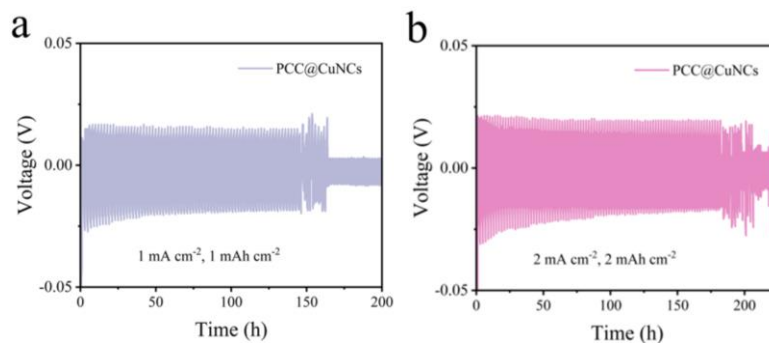

**Fig. S16** Galvanostatic cycling of symmetric cells of Zn//PCC@CuNCs at (a)  $1 \text{ mA cm}^{-2}$ ,  $1 \text{ mAh cm}^{-2}$  and (b)  $2 \text{ mA cm}^{-2}$ ,  $2 \text{ mAh cm}^{-2}$ .

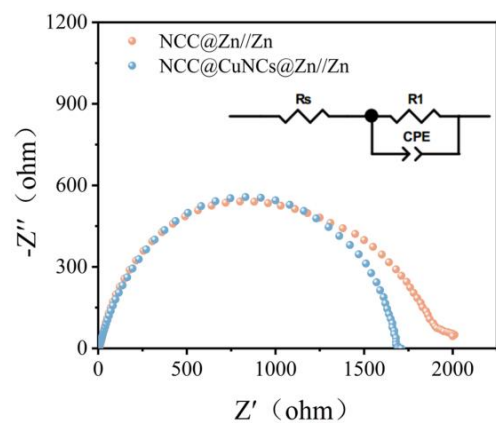

**Fig. S17** Impedance diagrams of symmetric cells NCC@Zn//Zn and NCC@CuNCs@Zn//Zn.

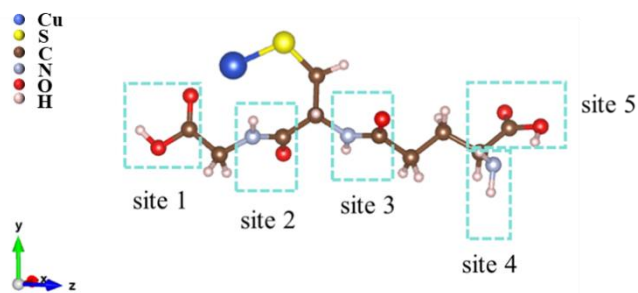

**Fig. S18** Molecular model of single GSH ligand on CuNCs for computation.

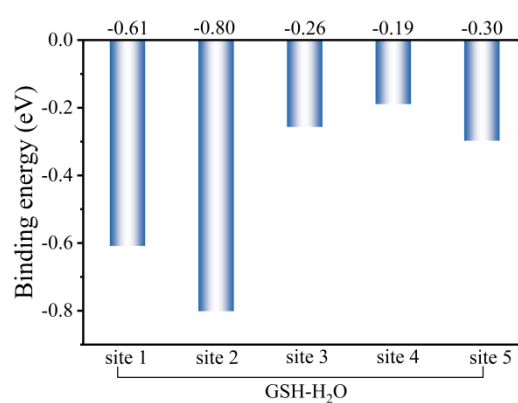

**Fig. S19** The hydrogen bonding force of glutathione with water at different active sites.

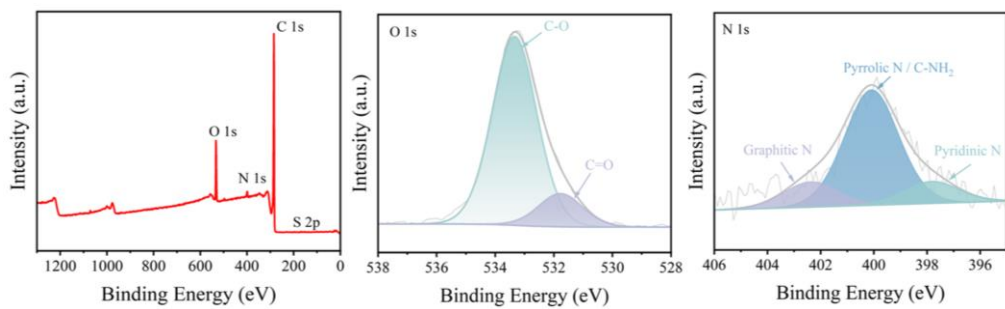

**Fig. S20** XPS spectra of NCC@GSH.

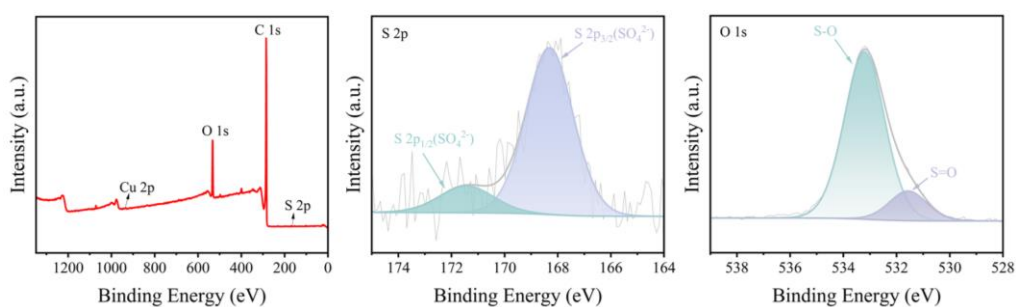

**Fig. S21** XPS spectra of NCC@CuSO<sub>4</sub>.

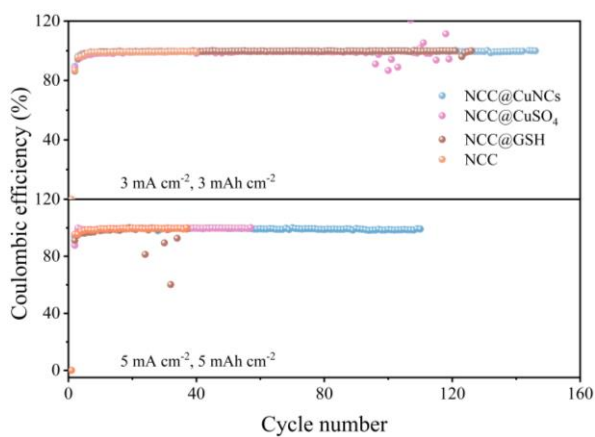

**Fig. S22** CE comparison diagrams of four different kinds of asymmetric cells based on different current collectors at current densities of  $3 \text{ mA cm}^{-2}$  and  $5 \text{ mA cm}^{-2}$ .



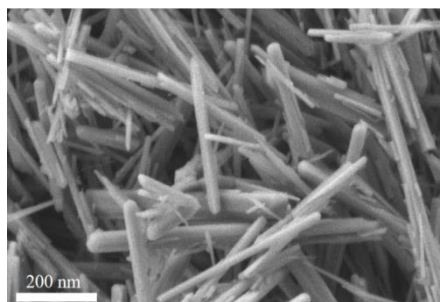

**Fig. S23** SEM image of  $\beta$ - $\text{MnO}_2$  cathode material.

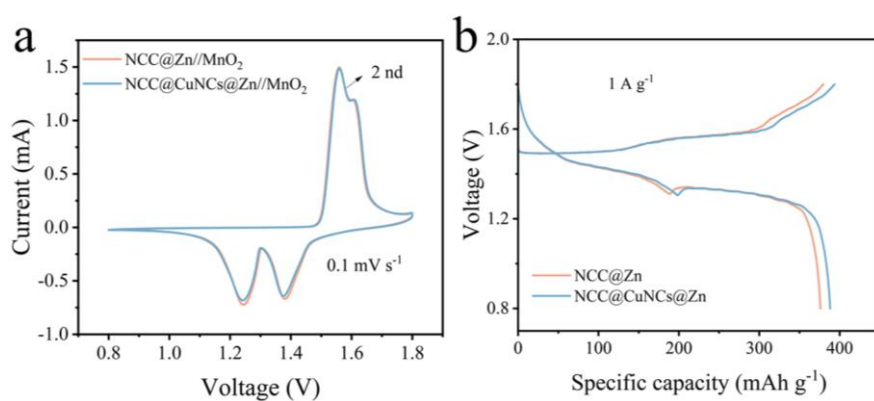

**Fig. S24** Comparison of electrochemical performance of Zn// $\text{MnO}_2$  full cells with NCC@Zn and NCC@CuNCs@Zn. (a) CV curves at  $0.1 \text{ mV s}^{-1}$ . (b) Charge/discharge curves at  $1 \text{ A g}^{-1}$ .

Table S1 The content of different types of N in NCC

| Name | Pyridinic N | Pyrrole N | Graphite N |
|------|-------------|-----------|------------|
| NCC  | 11.8%       | 67.1%     | 21.1%      |

Table S2 Comparison of asymmetric cells of this work and reported other substrates

| Modified current collector                          | Electrolyte                                              | Current density (mA cm <sup>-2</sup> ) | Capacity (mAh cm <sup>-2</sup> ) | Cycle number | CE     | Ref.      |
|-----------------------------------------------------|----------------------------------------------------------|----------------------------------------|----------------------------------|--------------|--------|-----------|
| Ti <sub>3</sub> C <sub>2</sub> T <sub>x</sub> MXene | 2.0 M ZnSO <sub>4</sub>                                  | 1.0                                    | 1.0                              | 400          | 94.13% | 2         |
|                                                     |                                                          | 5.0                                    | 1.0                              | 400          | -      |           |
| CNT                                                 | 2.0 M ZnSO <sub>4</sub>                                  | 2.0                                    | 2.0                              | 30           | 97.9%  | 3         |
| LM@CC                                               | 2.0 M ZnSO <sub>4</sub>                                  | 1.0                                    | -                                | 500          | >99%   | 4         |
| AgNPs@CC                                            | 1.0 M Zn (CF <sub>3</sub> SO <sub>3</sub> ) <sub>2</sub> | 5.0                                    | 2.0                              | 800          | 99.5%  | 5         |
| TiO <sub>x</sub> /Zn-NC                             | 2.0 M ZnSO <sub>4</sub>                                  | 5.0                                    | 1.0                              | 1000         | 98.6%  | 6         |
| NSH                                                 | 1.0 M ZnSO <sub>4</sub>                                  | 2.0                                    | 1.0                              | >200         | 99%    | 7         |
| CNF-Zn                                              | 2.0 M ZnSO <sub>4</sub>                                  | 2.0                                    | 1.0                              | 450          | 99.5%  | 8         |
|                                                     |                                                          | 5.0                                    | 2.0                              | 300          | 99.8%  |           |
| Cu-PAN                                              | 2.0 M ZnSO <sub>4</sub>                                  | 2.0                                    | 1.0                              | 120          | -      | 9         |
| NCC@CuNCs                                           | 2.0 M ZnSO <sub>4</sub>                                  | 1.0                                    | 1.0                              | 1000         | 99.4%  | This work |

Table S3 Comparison of symmetric cells of this work and reported other substrates

| Host                                                | Electrolyte                                                 | Current density<br>(mA cm <sup>-2</sup> ) | Capacity<br>(mAh cm <sup>-2</sup> ) | Cycle<br>life (h) | Ref.         |
|-----------------------------------------------------|-------------------------------------------------------------|-------------------------------------------|-------------------------------------|-------------------|--------------|
| AgNPs@CC                                            | 1 M Zn (CF <sub>3</sub> SO <sub>3</sub> ) <sub>2</sub>      | 2.0                                       | 2.0                                 | 800               | 5            |
| PANI@CC                                             | 3.0 M ZnSO <sub>4</sub> + 0.1 M<br>MnSO <sub>4</sub>        | 0.25                                      | 0.05                                | 250               | 10           |
|                                                     |                                                             | 2.0                                       | 0.1                                 | 88                |              |
| CC-CNF                                              | 2.0 M ZnSO <sub>4</sub>                                     | 0.25                                      | 0.25                                | 400               | 11           |
| CNT                                                 | 2.0 M ZnSO <sub>4</sub>                                     | 2.0                                       | 2.0                                 | 200               | 3            |
|                                                     |                                                             | 5.0                                       | 2.5                                 | 110               |              |
| LM@CC                                               | 2.0 M ZnSO <sub>4</sub>                                     | 2.0                                       | 1.0                                 | 300               | 4            |
|                                                     | 1.0 M ZnSO <sub>4</sub> +0.5 M                              |                                           |                                     |                   |              |
| Cu mesh                                             | Na <sub>2</sub> SO <sub>4</sub> +1 g L <sup>-1</sup><br>PAM | 0.2                                       | 1.0                                 | 350               | 12           |
| N-VG@CC                                             | 2.0 M ZnSO <sub>4</sub>                                     | 0.5                                       | 0.5                                 | 150               | 13           |
|                                                     |                                                             | 1.0                                       | 1.0                                 | 65                |              |
| Ti <sub>3</sub> C <sub>2</sub> T <sub>x</sub> MXene | 2.0 M ZnSO <sub>4</sub>                                     | 1.0                                       | 1.0                                 | 300               | 2            |
| 3D porous Cu<br>skeleton                            | 2.0 M ZnSO <sub>4</sub>                                     | 0.5                                       | 0.5                                 | 350               | 14           |
| TiOx/Zn-NC                                          | 2.0 M ZnSO <sub>4</sub>                                     | 1.0                                       | 1.0                                 | 450               | 6            |
| Cu mesh@CuO                                         | 1.0 M ZnSO <sub>4</sub>                                     | 1.0                                       | 1.0                                 | 340               | 15           |
| CNF-Zn@Zn                                           | 2.0 M ZnSO <sub>4</sub>                                     | 2.0                                       | 1.0                                 | 260               | 8            |
| Cu-PAN                                              | 2.0 M ZnSO <sub>4</sub>                                     | 2.0                                       | 1.0                                 | 270               | 9            |
| O, N-CC                                             | 2.0 M ZnSO <sub>4</sub>                                     | 2.0                                       | 2.0                                 | 240               | 16           |
| ACC-<br>600@Cu <sup>2+</sup>                        | 2.0 M ZnSO <sub>4</sub>                                     | 2.0                                       | 2.0                                 | 250               | 17           |
| NCC@CuNCs                                           | 2.0 M ZnSO <sub>4</sub>                                     | 1.0                                       | 1.0                                 | 513               | This<br>work |
|                                                     |                                                             | 2.0                                       | 2.0                                 | 400               | This<br>work |

## References

1. X. Zhang, L. Zhang, X. Jia, W. Song and Y. Liu, Design Strategies for Aqueous Zinc Metal Batteries with High Zinc Utilization: From Metal Anodes to Anode-Free Structures, *Nano-Micro Lett.*, 2024, **16**, 75.
2. X. Li, M. Li, K. Luo, Y. Hou, P. Li, Q. Yang, Z. Huang, G. Liang, Z. Chen, S. Du, Q. Huang and C. Zhi, Lattice Matching and Halogen Regulation for Synergistically Induced Uniform Zinc Electrodeposition by Halogenated Ti<sub>3</sub>C<sub>2</sub> MXenes, *ACS Nano*, 2022, **16**, 813-822.
3. Y. X. Zeng, X. Y. Zhang, R. F. Qin, X. Q. Liu, P. P. Fang, D. Z. Zheng, Y. X. Tong and X. H. Lu, Dendrite-Free Zinc Deposition Induced by Multifunctional CNT Frameworks for Stable Flexible Zn-Ion Batteries, *Adv. Mater.*, 2019, **31**, 1903675.
4. X. Jiang, Y. Lam, W. Li, S. Jiang and H. Jia, Self-healing composite anode induced by liquid-metal interlayer for flexible Zn ion storage application, *Compos. Commun.*, 2024, **45**, 101796.
5. T. Chen, Y. Wang, Y. Yang, F. Huang, M. Zhu, B. T. W. Ang and J. M. Xue, Heterometallic Seed-Mediated Zinc Deposition on Inkjet Printed Silver Nanoparticles Toward Foldable and Heat-Resistant Zinc Batteries, *Adv. Funct. Mater.*, 2021, **31**, 2101607.
6. P. X. Sun, Z. Cao, Y. X. Zeng, W. W. Xie, N. W. Li, D. Luan, S. Yang, L. Yu and X. W. D. Lou, Formation of Super-Assembled TiO<sub>x</sub>/Zn/N-Doped Carbon Inverse Opal Towards Dendrite-Free Zn Anodes, *Angew. Chem., Int. Ed.*, 2022, **61**, e202115649.
7. Q. Jian, Z. Guo, L. Zhang, M. Wu and T. Zhao, A hierarchical porous tin host for dendrite-free, highly reversible zinc anodes, *Chem. Eng. J.*, 2021, **425**, 130643.
8. J.-H. Wang, L.-F. Chen, W.-X. Dong, K. Zhang, Y.-F. Qu, J.-W. Qian and S.-H. Yu, Three-Dimensional Zinc-Seeded Carbon Nanofiber Architectures as Lightweight and Flexible Hosts for a Highly Reversible Zinc Metal Anode, *ACS Nano*, 2023, **17**, 19087-19097.
9. S. Kumar, H. Yoon, H. Park, G. Park, S. Suh and H.-J. Kim, A dendrite-free anode for stable aqueous rechargeable zinc-ion batteries, *J. Ind. Eng. Chem.*, 2022, **108**, 321-327.
10. Y. Li, Z. X. Tan, Y. S. Liang, Y. Xiao, D. D. Cen, Y. L. Liu and Y. R. Liang, Amine-Functionalized Carbon Cloth Host for Dendrite-Free Zn Metal Anodes, *ACS Appl. Energy Mater.*, 2021, **4**, 4482-4488.
11. Z. Jiang, S. Zhai, L. Shui, Y. Shi, X. Chen, G. Wang and F. Chen, Dendrite-free Zn anode supported with 3D carbon nanofiber skeleton towards stable zinc ion batteries, *J. Colloid Interface Sci.*, 2022, **623**, 1181-1189.
12. Q. Zhang, J. Y. Luan, L. Fu, S. G. Wu, Y. G. Tang, X. B. Ji and H. Y. Wang, The Three-Dimensional Dendrite-Free Zinc Anode on a Copper Mesh with a Zinc-Oriented Polyacrylamide Electrolyte Additive, *Angew. Chem., Int. Ed.*, 2019, **58**, 15841-15847.
13. Q. H. Cao, H. Gao, Y. Gao, J. Yang, C. Li, J. Pu, J. J. Du, J. Y. Yang, D. M. Cai, Z. H. Pan, C. Guan and W. Huang, Regulating Dendrite-Free Zinc Deposition by 3D Zincophilic Nitrogen-Doped Vertical Graphene for High-Performance Flexible Zn-Ion Batteries, *Adv. Funct. Mater.*, 2021, **31**, 2103922.
14. Z. Kang, C. L. Wu, L. B. Dong, W. B. Liu, J. Mou, J. W. Zhang, Z. W. Chang, B. Z. Jiang, G. X. Wang, F. Y. Kang and C. J. Xu, 3D Porous Copper Skeleton Supported Zinc Anode toward High Capacity and Long Cycle Life Zinc Ion Batteries, *ACS Sustainable Chem. Eng.*, 2019, **7**, 3364-3371.
15. Q. Zhang, J. Y. Luan, X. B. Huang, L. Zhu, Y. G. Tang, X. B. Ji and H. Y. Wang, Simultaneously Regulating the Ion Distribution and Electric Field to Achieve Dendrite-Free Zn Anode, *Small*, 2020, **16**, 2000929.
16. M. Zhou, G. Sun and S.-Q. Zang, Uniform zinc deposition on O,N-dual functionalized carbon cloth current collector, *J. Energy Chem.*, 2022, **69**, 76-83.
17. M. Zhou, Z. Wu, R. Wang, G. Sun and S.-Q. Zang, An in situ reduction strategy toward dendrite-free Zn anodes, *Sci. China Mater.*, 2023, **66**, 1757-1766.
